# Supplementary material for: Structures of KEOPS bound to tRNA reveal functional roles of the kinase Bud32
Source: PubMed Central journal article supplement — Nat Commun. 2024 Dec 5;15:10633. doi: 10.1038/s41467-024-54787-w (PMC11621456; doi:10.1038/s41467-024-54787-w), 2024-12-05
Supplement: 41467_2024_54787_MOESM1_ESM.pdf [file 41467_2024_54787_MOESM1_ESM.pdf]

**Structures of KEOPS bound to tRNA reveal regulatory roles  
of the kinase Bud32**

Samara Mishelle Ona Chuquimarca<sup>1,2</sup>, Jonah Beenstock<sup>2</sup>, Salima Daou<sup>2</sup>, Jennifer Porat<sup>3</sup>, Alexander F.A. Keszei<sup>4</sup>, Zhe Yin<sup>2,5</sup>, Tobias Beschauner<sup>2,5</sup>, Mark A. Bayfield<sup>3</sup>, Mohammad Mazhab-Jafari<sup>4</sup>, Frank Sicheri<sup>1,2,5</sup>

# Supplementary Figure 1

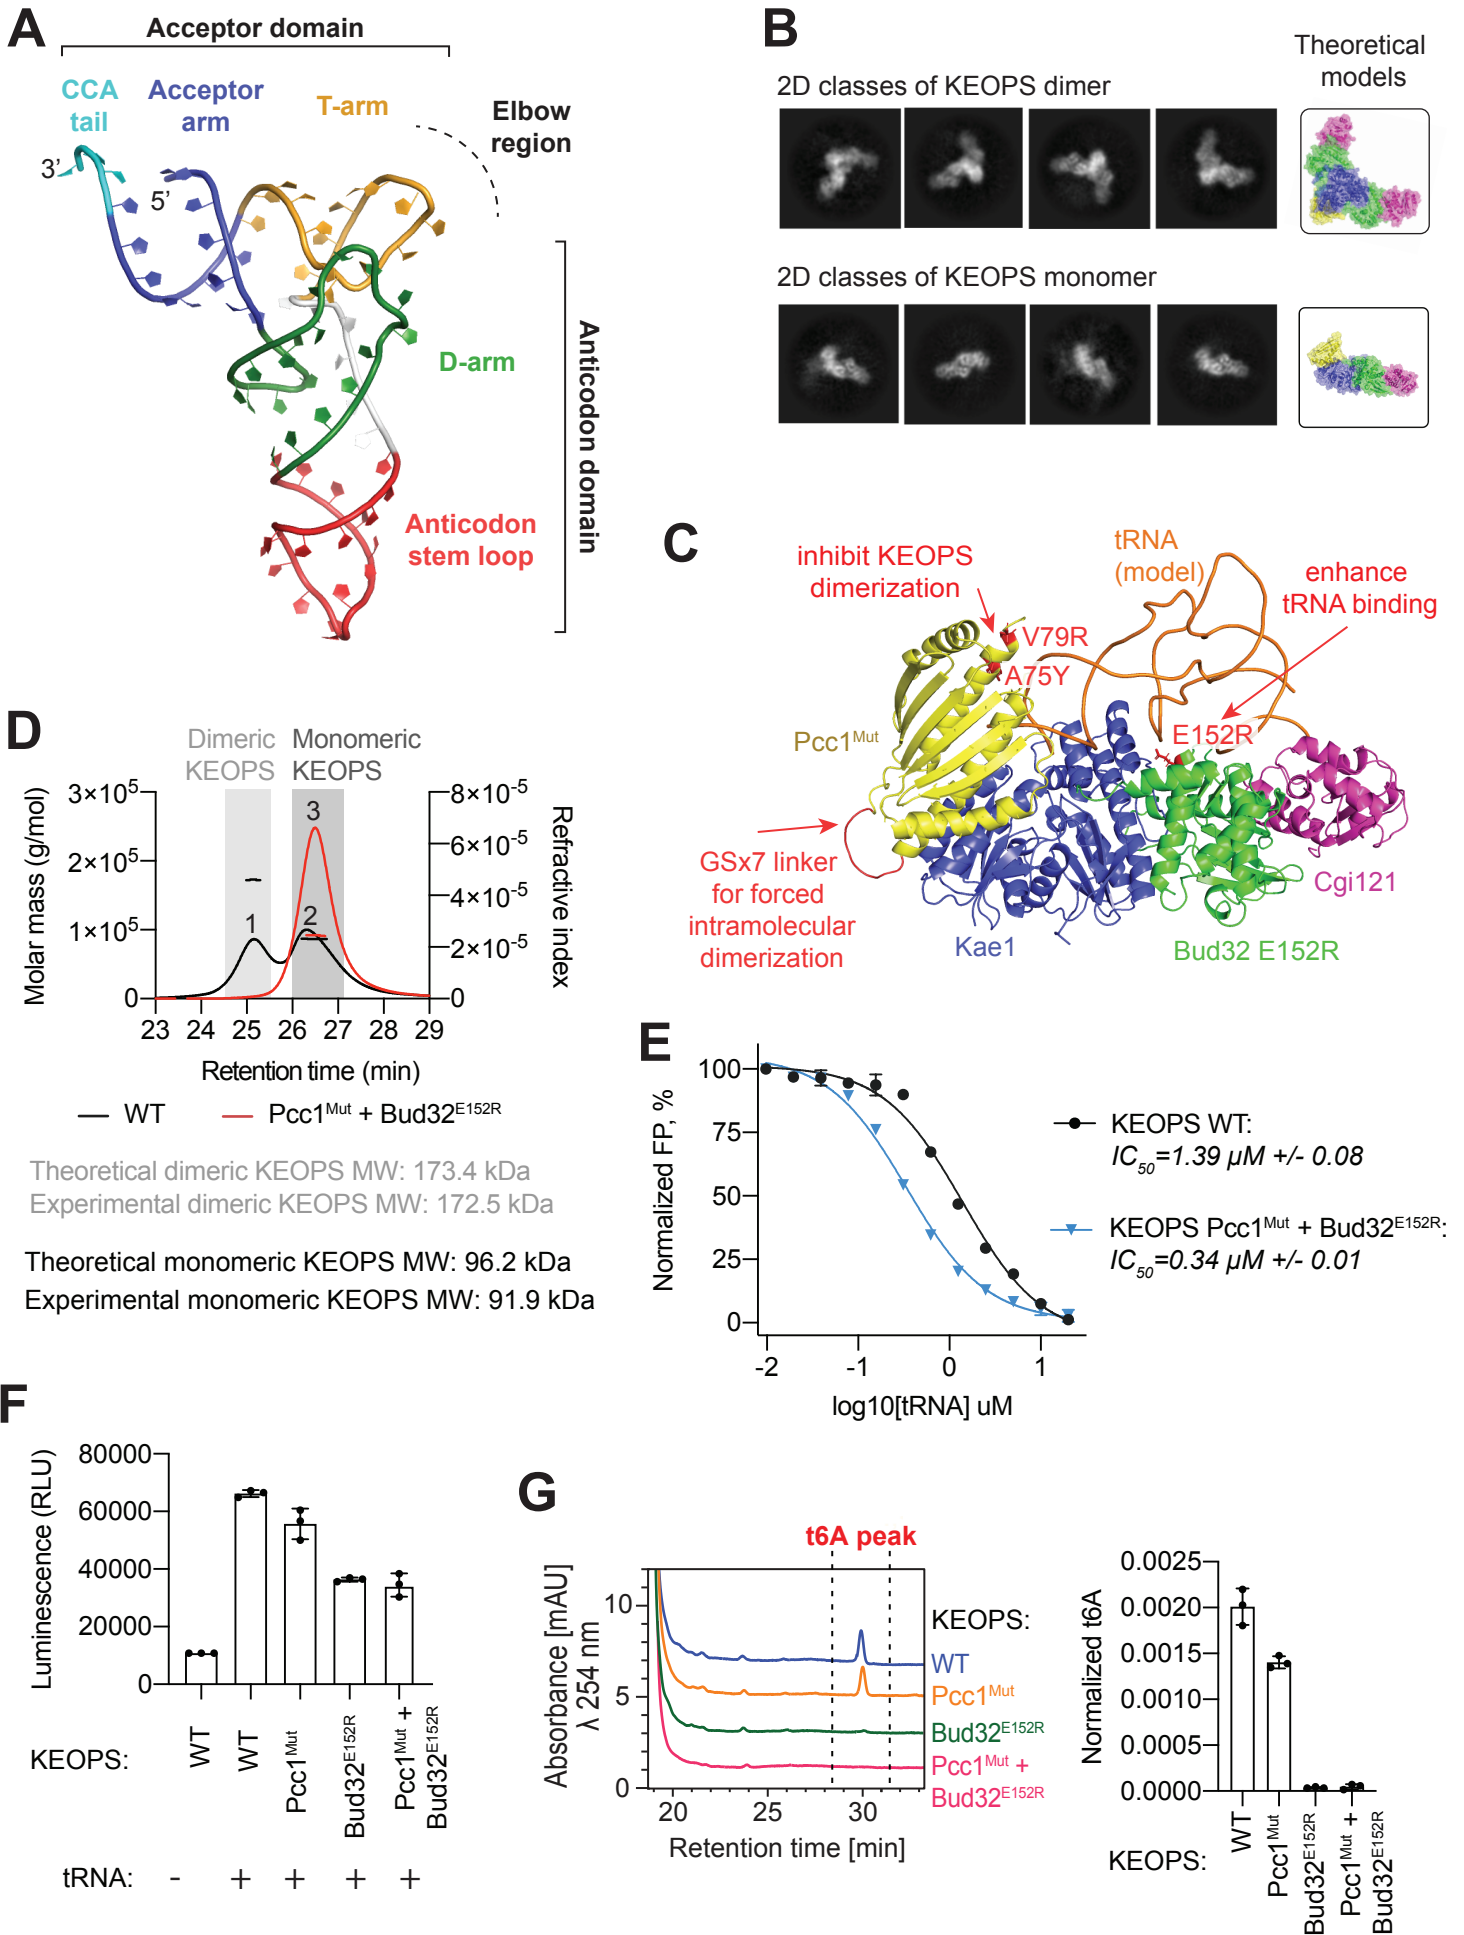

## Supplementary Figure 1. Cryo-EM sample preparation of KEOPS bound to a substrate tRNA

**a** Cartoon representation of the tRNA crystal structure of *M. jannaschii* tRNA<sup>Lys</sup> (PDB 7KJU) highlighting its conserved structural elements.

**b** (left) Representative 2D classes of cryo-EM images made with archaeal KEOPS reconstituted with WT Cgi121, Bud32, Kae1 and Pcc1 proteins in the presence of tRNA. 2D classes consistent with dimeric KEOPS and monomeric KEOPS are shown on the top and bottom panels respectively with no evidence of tRNA binding. (right) Surface representation of KEOPS dimer and monomer models are shown for comparison with 2D classes.

**c** Engineered mutations in KEOPS proteins to reduce monomer-dimer heterogeneity and to enhance tRNA binding in cryo-EM samples. The Bud32 E152R mutation, which enhances KEOPS tRNA binding affinity<sup>40</sup>, orients towards tRNA in a composite enzyme-substrate model<sup>40</sup>. A seven GS dipeptide linker in Pcc1<sup>Mut</sup> joining two Pcc1 protomers is expected to promote an intramolecular dimer. The V79R and A75Y mutations on one of the Pcc1 protomers in Pcc1<sup>Mut</sup> disables one of two Kae1 binding surfaces thereby inhibiting KEOPS dimerization.

**d** SEC-MALS analysis of KEOPS WT (black) and KEOPS reconstituted with Bud32<sup>E152R</sup> and Pcc1<sup>Mut</sup> (red). KEOPS WT displays a monomeric-dimeric equilibrium while KEOPS with Bud32<sup>E152R</sup> and Pcc1<sup>Mut</sup> is exclusively monomeric.

**e** Competitive displacement of an Alexa-647 labeled CCA-tail probe (647-CCA) from KEOPS WT or KEOPS reconstituted with the Bud32<sup>E152R</sup> and Pcc1<sup>Mut</sup> by titration of tRNA<sup>Lys</sup>. Displacement of the 647-CCA probe was monitored by fluorescence polarization (FP). Respective IC<sub>50</sub> values for the displacement are shown (n=3 technical replicates, bars indicate ±SD).

**f** ATPase activity analysis of the indicated KEOPS complexes in the presence and absence of tRNA, monitored using the ADP Glo assay. Displayed results represent the average luminescence for each reaction condition (n = technical replicates, ±SD).

**g** t<sup>6</sup>A modification activity analysis of the indicated KEOPS complexes reconstituted with Bud32 WT and Pcc1 WT or the indicated mutants with tRNA<sup>Lys</sup> used as substrate. Representative HPLC profiles of nucleoside composition for each reaction are shown at

left. Quantification of average t<sup>6</sup>A content normalized to the content of uridine is shown at right (n=3 technical replicates, ±SD).

Source data are provided as a Source Data file.

# Supplementary Figure 2

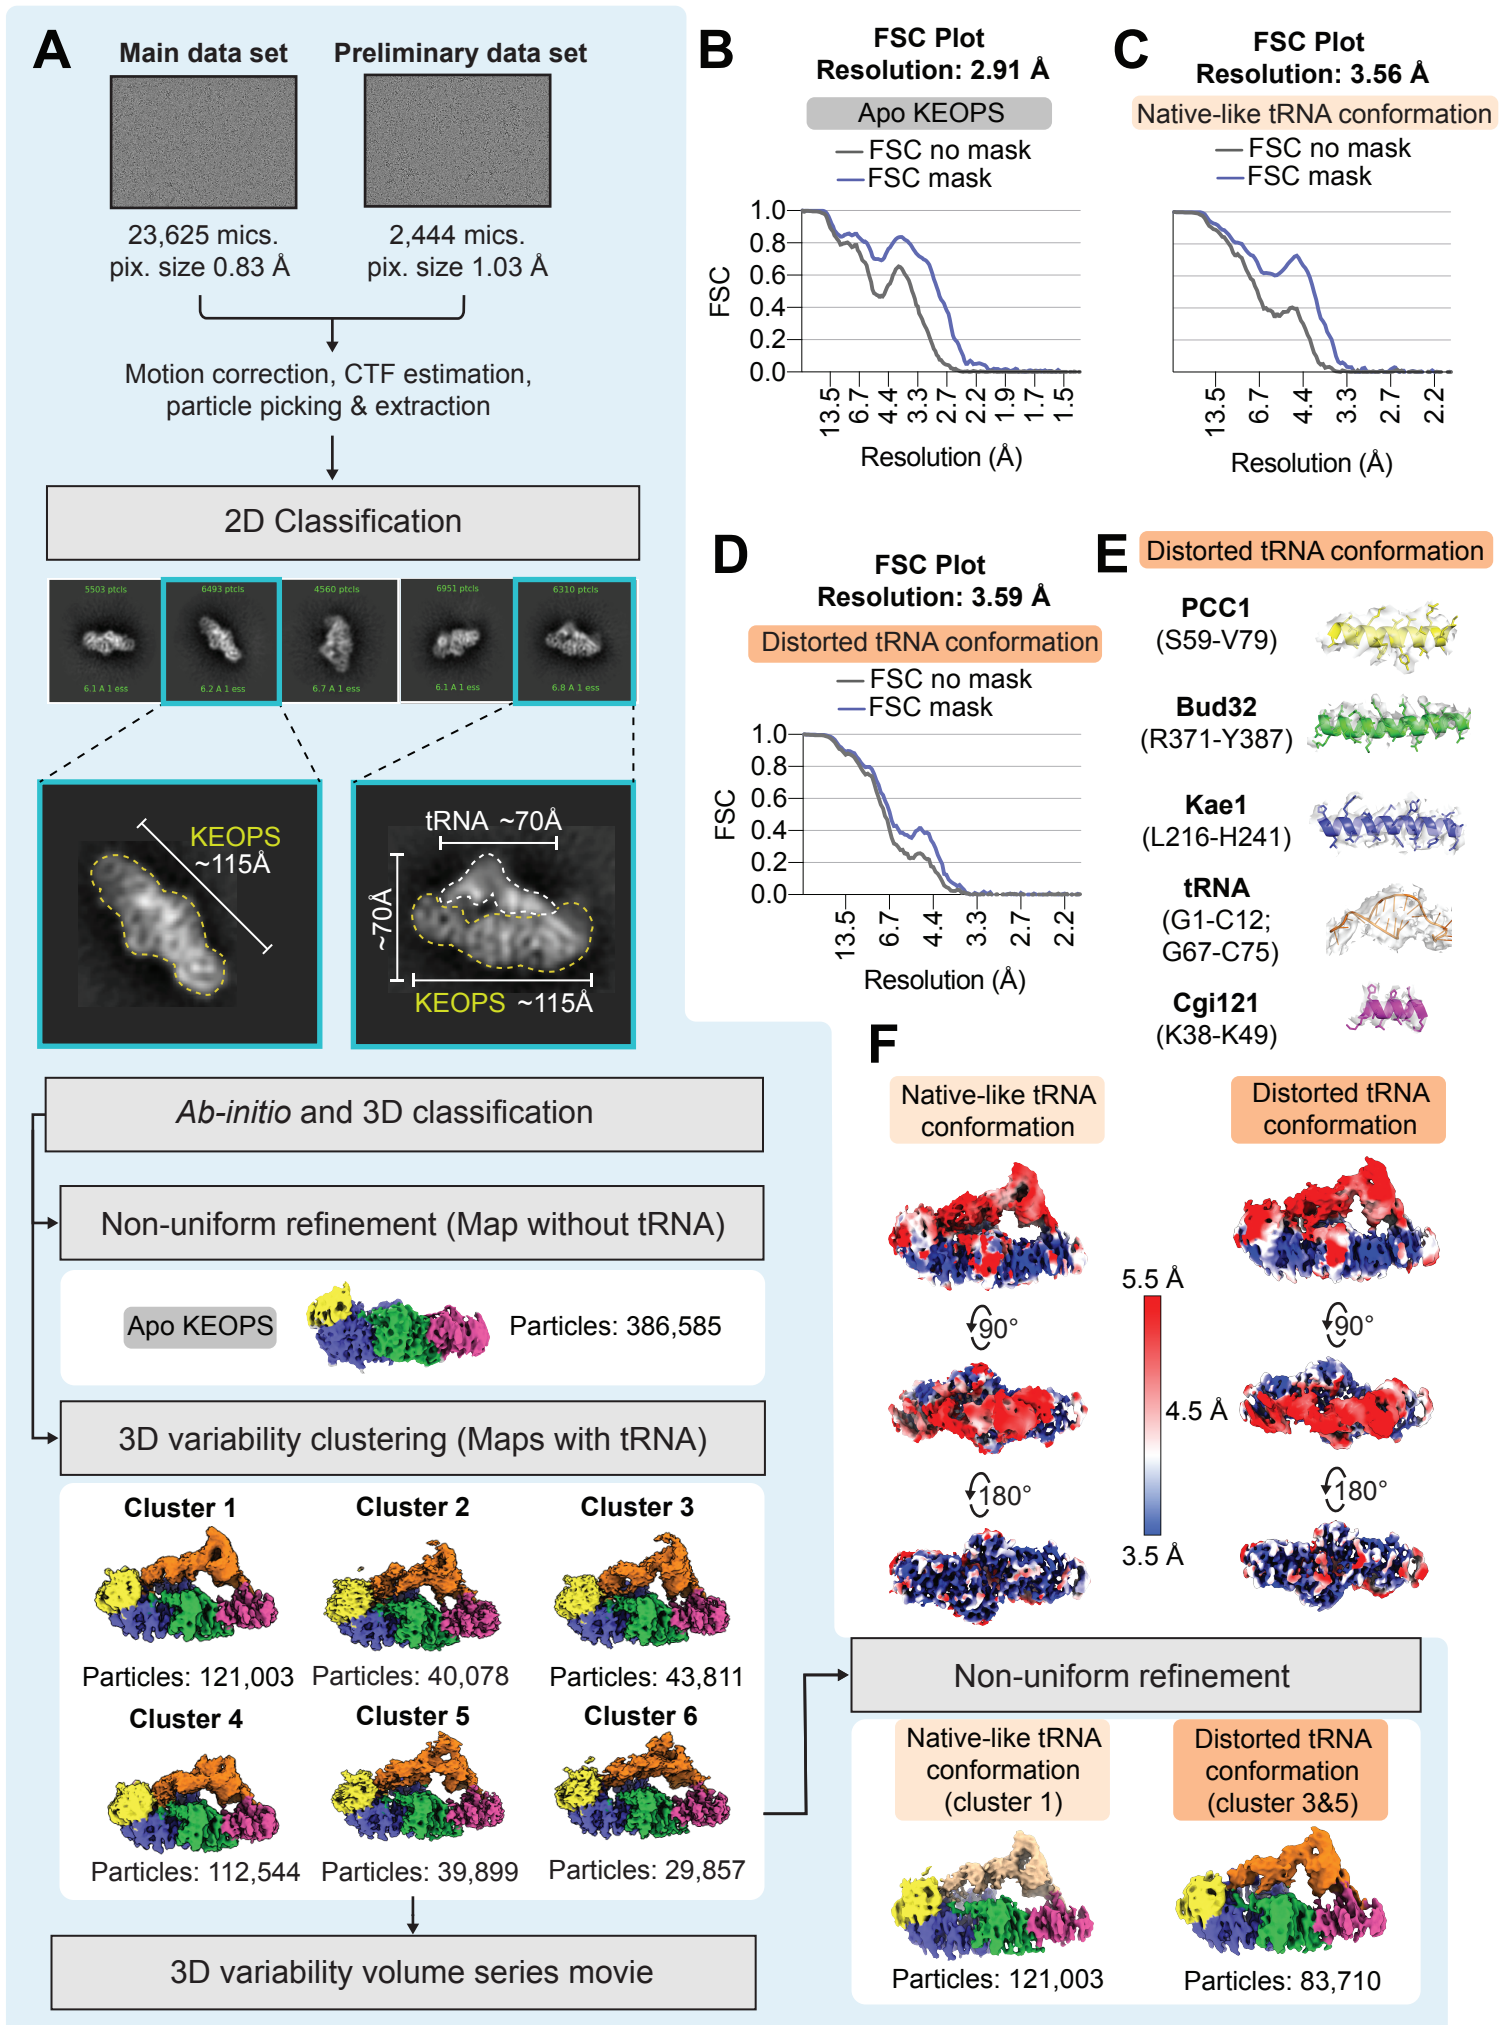

## Supplementary Figure 2. Cryo-EM workflow and map quality statistics of KEOPS with and without bound substrate tRNA

**a** Flow chart showing the cryo-EM multi-stage image processing workflow.

Reconstruction of the data yielded density maps for apo KEOPS (2.91 Å), KEOPS bound to tRNA in a native-like conformation (3.56 Å) and KEOPS bound to tRNA in a distorted conformation (3.59 Å).

**b-d** Fourier Shell Correlation (FSC) curves of apo KEOPS, KEOPS bound to tRNA in its native-like conformation and KEOPS bound to tRNA in its distorted conformation (resolution at 2.91 Å, 3.56 Å, 3.59 Å, respectively).

**e** Representative secondary structure regions illustrating the quality of the cryo-EM map for KEOPS bound to tRNA in a distorted conformation. Representative secondary structure regions of KEOPS bound to tRNA in a native-like conformation and apo KEOPS are not shown for simplicity but have a similar quality.

**f** Local resolution maps of KEOPS with the native-like (left) and distorted (right) tRNA conformations. Color gradient indicates the resolution per residue ranging from ~3.5 Å (blue) to 5.5 Å (red).

# Supplementary Figure 3

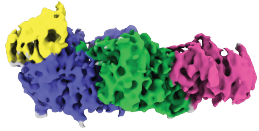

Apo KEOPS

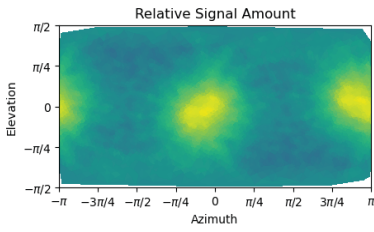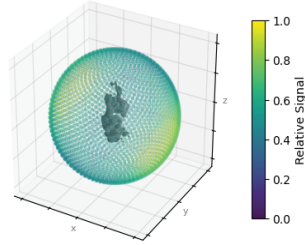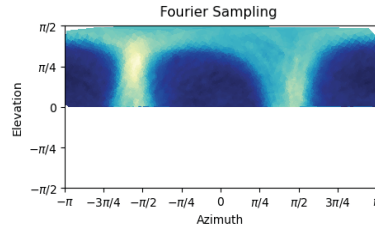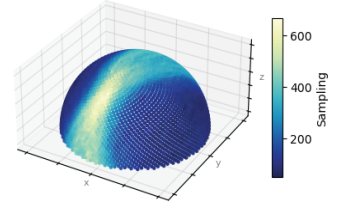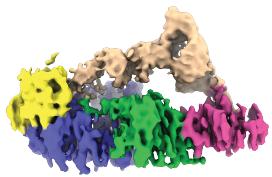

Native-like tRNA conformation (cluster 1)

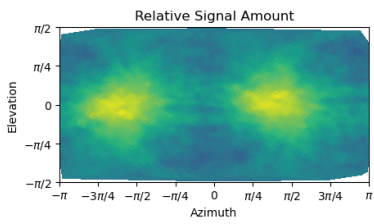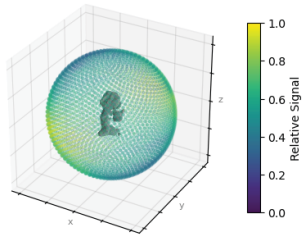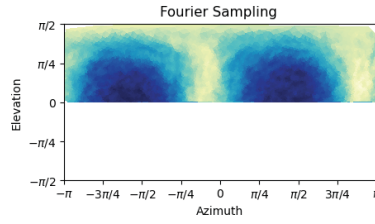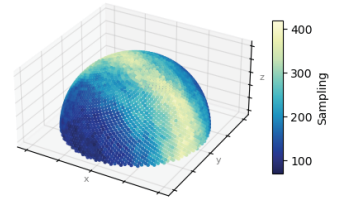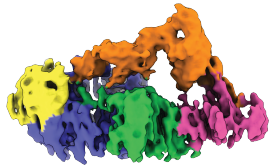

Distorted tRNA conformation (cluster 3&5)

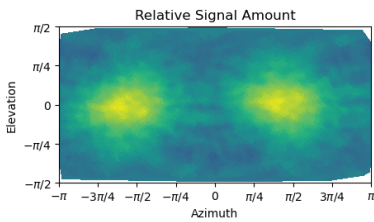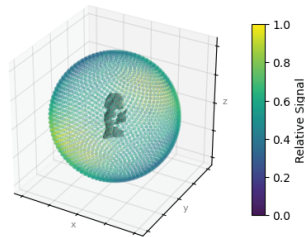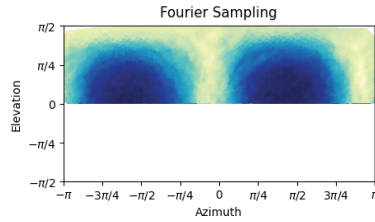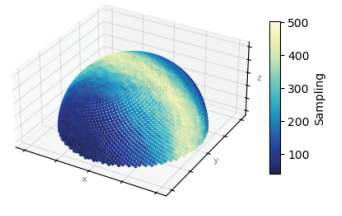

### **Supplementary Figure 3. Map anisotropy analysis**

Particle angular distribution Fourier Shell Correlation (FSC) profiles of apo KEOPS, KEOPS bound to tRNA in its native-like conformation and KEOPS bound to tRNA in its distorted conformation (resolution at 2.91 Å, 3.56 Å, 3.59 Å, respectively) calculated in cryoSPARC.



# Supplementary Figure 4

**A**

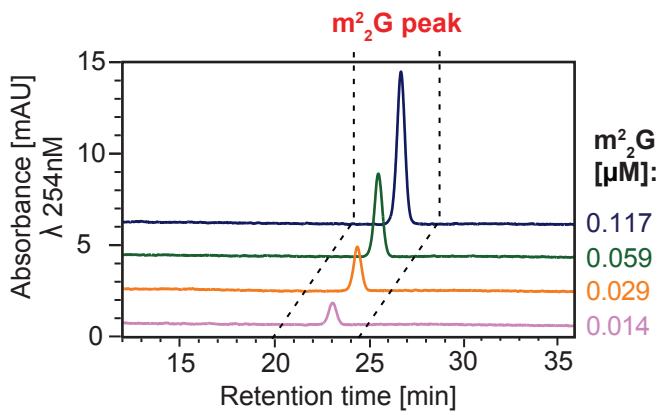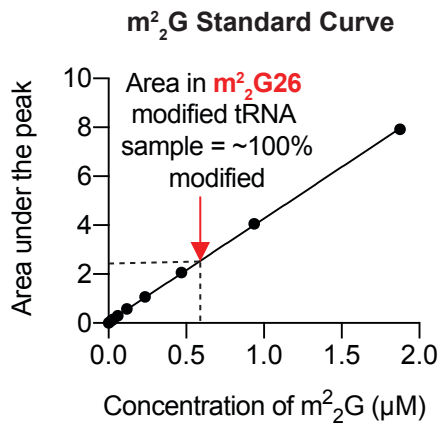

**B**

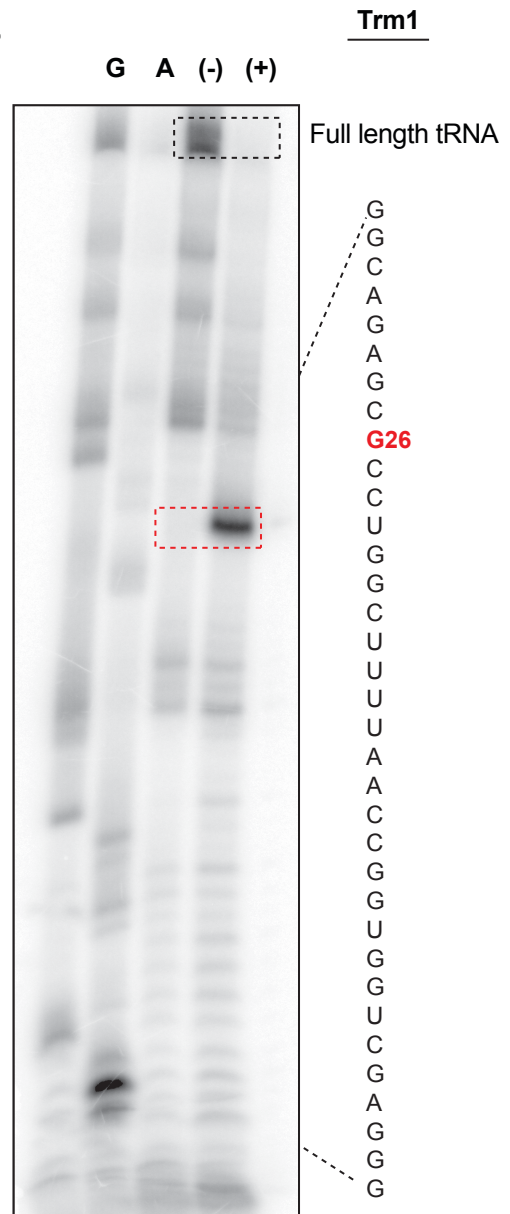

**Supplementary Figure 4. *In vitro* m<sup>2</sup><sub>2</sub>G-modification of tRNA<sup>Lys</sup> by Trm1.**

**a** HPLC quantification of m<sup>2</sup><sub>2</sub>G content of tRNA samples shown in **Fig. 4e**. (Top) Representative HPLC chromatograms of an m<sup>2</sup><sub>2</sub>-guanine (m<sup>2</sup><sub>2</sub>G) standard molecule at the indicated concentrations. (Bottom) The area beneath each peak was measured and plotted to obtain an m<sup>2</sup><sub>2</sub>G standard curve. Red arrow indicates the quantified value for the samples shown in **Fig. 4e**, which corresponds to ~100 % m<sup>2</sup><sub>2</sub>G-modification of tRNA<sup>Lys</sup>.

**b** Primer extension analysis of m<sup>2</sup><sub>2</sub>G-modified and non-modified tRNA<sup>Lys</sup>. Red box indicates quantitative blockage of reverse transcriptase arising from complete m<sup>2</sup><sub>2</sub>G modification at G26. G and A refer to sequencing lanes where ddCTP and ddTTP were added respectively. These lanes were used to assign positions to the bands in the reverse transcriptase reaction. Each band in the G lane for example corresponds to a G in the tRNA sequence (as read out by a ddCTP "stop"). By comparing the sequencing lanes to our experimental lanes, we can assign the strong primer extension stop in the +Trm1 lane to G26 as it occurs one base before the band in the G sequencing lane.

Source data are provided as a Source Data file.

# Supplementary Figure 5

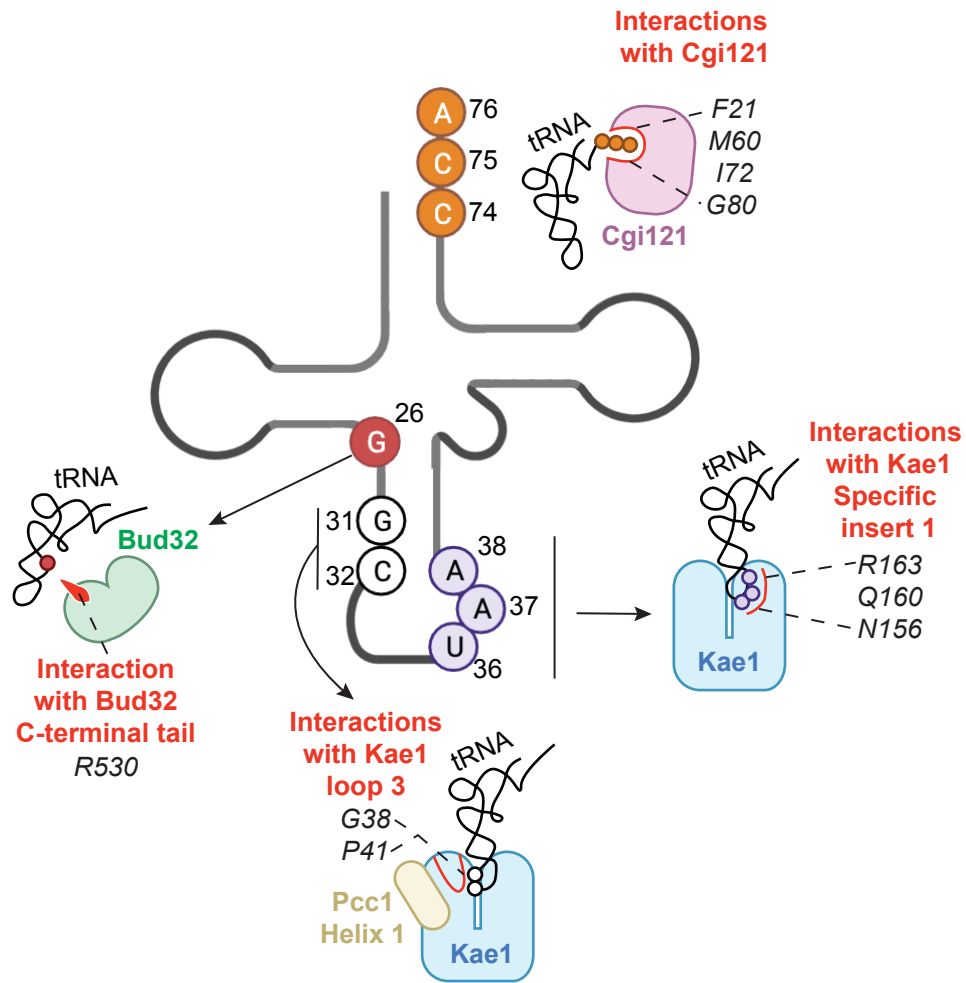

## Supplementary Figure 5. Analysis of contacts between KEOPS and its substrate tRNA

Schematic representation depicting the interactions between KEOPS and the tRNA in either its native-like or distorted conformations.

(top) In both tRNA conformations, the CCA tail is engaged by Cgi121.

(left) In the distorted conformation, G26 interacts with the C-terminal tail of Bud32.

(middle) In the distorted conformation, the anticodon region is engaged by residues in a structured loop 3 of Kae1 and Helix 1 of Pcc1.

(right) In the native-like conformation, the anticodon region is engaged by residues from Kae1-specific-insert 1. A disordered loop 3 in Kae1 is denoted by dashed line.

For simplicity, only the proteins directly interacting with the tRNA in each conformation

**Supplementary Table 1. Q-score analysis of side chains of interest resolvability in the cryo-EM maps. Q-score of 1 indicates ideal resolvability.**

|       |        | Native-like | Distorted   |
|-------|--------|-------------|-------------|
| Bud32 | Asp451 | 0.43        | 0.178       |
|       | Arg530 | 0.32        | 0.378       |
| Kae1  | Gly38  | Not modeled | 0.158       |
|       | Pro41  | 0.25        | 0.235       |
|       | Asn156 | 0.40        | 0.393       |
|       | Gln160 | 0.24        | 0.332       |
|       | Arg163 | 0.38        | 0.343       |
|       | Arg237 | 0.46        | 0.227       |
| Pcc1  | Arg63  | 0.16        | 0.147       |
| tRNA  | C10    | 0.33        | -0.03       |
|       | U11    | 0.24        | 0.23        |
|       | G24    | 0.30        | -0.089      |
|       | C25    | 0.18        | -0.051      |
|       | G26    | 0.16        | 0.299       |
|       | G31    | 0.10        | 0.07        |
|       | C32    | 0.05        | 0.107       |
|       | U36    | 0.21        | Not modeled |
|       | A37    | 0.29        | Not modeled |
|       | A38    | 0.27        | Not modeled |
|       | U44    | 0.19        | 0.249       |
|       | G45    | 0.15        | -0.014      |

**Supplementary Table 2. Primers for site directed mutagenesis used in this study.**

| <b>Primer name</b>             | <b>Target</b> | <b>Sequence</b>                          |                          |
|--------------------------------|---------------|------------------------------------------|--------------------------|
| E152R forward                  | Bud32         | GAAAGATTTCAAATCTTGATAGAGATAAGGCAGTTG     |                          |
| E152R reverse                  |               | CAACTGCCTTATCTCTATCAAGATTTGAAATCTTTC     |                          |
| D451R forward                  |               | CGATGTAATTCATAATCGCTTAACTACATCCAAC       |                          |
| D451R reverse                  |               | GTTGGATGTAGTTAAGCGATTATGAATTACATCG       |                          |
| R530D forward                  |               | GGATGTTGAAAGAGACGCAAGATATGTAGAGTAATAACTC |                          |
| R530D reverse                  |               | GAGTTACTCTACATATCTTGCGTCTCTTTCAACATCC    |                          |
| P41A forward                   | Kae1          | GGGTATTAATGCTAGAGAGGCTGCTGACC            |                          |
| P41A reverse                   |               | GGTCAGCAGCCTCTCTAGCATTAAATACCC           |                          |
| N156A forward                  |               | GCTGTTGGTGCATGCTTAGACCAG                 |                          |
| N156A reverse                  |               | CTGGTCTAAGCATGCACCAACAGC                 |                          |
| Q160D forward                  |               | GTAAGTCTTAGACGACTTTGCAAGATATGTGAATTTGC   |                          |
| Q160D reverse                  |               | GCAAATTCACATATCTTGCAAAGTCGTCTAAGCAGTTAC  |                          |
| R163E forward                  |               | CTTAGACCAGTTTGCAGACTATGTGAATTTGCCACATCC  |                          |
| R163E reverse                  |               | GGATGTGGCAAATTCACATAGTCTGCAAACCTGGTCTAAG |                          |
| C25A forward                   | tRNA Lys      | GCTCAGTCTGGCAGAGAGCCTGGC                 |                          |
| C25A reverse                   |               | GCCAGGCTCTCTGCCAGACTGAGC                 |                          |
| C10U+U11C forward              |               | GGGCCCGTAGTCCAGTCTGGCAGAGC               |                          |
| C10U+U11C reverse              |               | GCTCTGCCAGACTGGACTACGGGCCC               |                          |
| G45T forward                   |               | GGCTTTTAACCGGTTGTCGAGGGTTCAAATC          |                          |
| G45T reverse                   |               | GATTTGAACCCTCGACAACCGGTTAAAAGCC          |                          |
| G24A forward                   |               | CTGGCAGAACGCCTGGCTTTTAAC                 |                          |
| G24A reverse                   |               | GTTAAAAGCCAGGCGTTCTGCCAG                 |                          |
| G26T forward                   |               | CTGGCAGAGCTCCTGGCTTTTAAC                 |                          |
| G26T reverse                   |               | GTTAAAAGCCAGGAGCTCTGCCAG                 |                          |
| G26C forward                   |               | CTGGCAGAGCCCCTGGCTTTTAAC                 |                          |
| G26C reverse                   |               | GTTAAAAGCCAGGGGCTCTGCCAG                 |                          |
| G26A forward                   |               | CTGGCAGAGCACCTGGCTTTTAAC                 |                          |
| G26A reverse                   |               | GTTAAAAGCCAGGTGCTCTGCCAG                 |                          |
| 34-CTG-37 to 34-UAA-37 forward |               | tRNA Ala                                 | GAGCGCCGCATTGGTAATGCGGAG |
| 34-CTG-37 to 34-UAA-37 reverse |               |                                          | CTCCGCATTACCAATGCGGCGCTC |
| 34-CAA-37 to 34-UAA-37 forward | tRNA Val      | CTATGATGCCGCCCTTAAACGGCGGTGGTTCG         |                          |
| 34-CAA-37 to 34-UAA-37 reverse |               | CGACCACCGCCGTTTAAAGGGCGGCATCATAG         |                          |

**Supplementary Table 3. Sequences of DNA constructs used for in vitro transcription of tRNAs in this study. All tRNA constructs have a T7 promotor sequence at the 5' and a Ribozyme sequence at the 3'.**

| <b>RNA name</b>   | <b>Sequence</b>                                                                                                                        |
|-------------------|----------------------------------------------------------------------------------------------------------------------------------------|
| T7 promotor       | TAATACGACTCACTATA                                                                                                                      |
| Ribozyme          | GGCCGGCATGGTCCCAGCCTCCTCGCTGGCGCCGGCTGGGCA<br>ACATTCCGAGGGGACCGTCCCCTCGGTAATGGCGAATGGGACC<br>CAGGCTTAGTATAGCGAGGTTAGCTACACTCGTGCTGAGCC |
| tRNA Lys          | GGGCCCCTAAGCTCAGTCTGGCAGAGCGCCTGGCTTTTAACCG<br>GTGGTCGAGGGTTCAAATCCCCTTCGGGCCCGCCA                                                     |
| tRNA Val          | GGGCTCGTGGTCTAGATGGCtATGATGCCGCCCTGACACGGCGG<br>TGGtCGGGAGTTCGAATCTCCCCGAGCCCACCA                                                      |
| tRNA Ala          | GGGCTGGTAGCTCAGACTGGGAGAGCGCCGCATTGGCTGTGCG<br>GAGGCCGCGGGTTCAAATCCCGCCAGTCCACCA                                                       |
| tRNA Arg          | GCCCGGGTCGCCTAGCCAGGATAGGGCGCTGGCCTGCGGAGC<br>CAGTTTTTTCAGGGGTTCAAATCCCCTCCCAGGGCGC                                                    |
| tRNA Asp          | GCCCTGGTGGTGTAGCCCGGCCTATCATACGGGACTGTCACTCC<br>CGTGACTCGGGTTCAAATCCCAGGCCAGGGCGCCA                                                    |
| tRNA Arg<br>Eng1  | GCCCGGGTCCTCTAGCCAGGATAGGGCGCTGGCCTGCTAAGCC<br>AGTGTTCAGGGGTTCAAATCCCCTCCCAGGGCGCCA                                                    |
| tRNA Arg Eng<br>2 | GCCCGGGTGCTCTAGCCAGGATAGAGCGCTGGCCTGCTAAGCC<br>AGTGTTCAGGGGTTCAAATCCCCTCCCAGGGCGCCA                                                    |
| tRNA Arg<br>Eng3  | GCCCGGGTGCTCAAGCCAGGACAGAGCGCCTGGCTTTTAACCA<br>GGTGGTCTCAGGGGTTCAAATCCCCTCCCAGGGCGCCA                                                  |
| tRNA Asp<br>Eng1  | GCCCTGGTGCTGTAGCCCGGCCTATCGCGCGGGACTGTTAATC<br>CCGTGACTCGGGTTCAAATCCCAGGCCAGGGCGCCA                                                    |
| tRNA Asp Eng<br>2 | GCCCTGGTGCTCTAGCCCGGCCTATAGCGCGGGACTGTTAATCC<br>CGTGACTCGGGTTCAAATCCCAGGCCAGGGCGCCA                                                    |
| tRNA Asp<br>Eng3  | GCCCTGGTGCTCAAGCCCGGCCAGAGCGCCTGGCTTTTAACC<br>AGGTGGTCCGGGTTCAAATCCCAGGCCAGGGCGCCA                                                     |
| tRNA Val<br>Eng1  | GGGCTCGTGCTCTAGATGGCTATGGCGCCGCCCTGATAAGGCG<br>GTGGTCGGGAGTTCGAATCTCCCCGAGCCCACCA                                                      |
| tRNA Val Eng<br>2 | GGGCTCGTGCTCTAGATGGCTATAGCGCCGCCCTGATAAGGCGG<br>TGGTCGGGAGTTCGAATCTCCCCGAGCCCACCA                                                      |
| tRNA Val<br>Eng3  | GGGCTCGTGCTCAAGATGGCCAGAGCGCCTGGCTTTTAACCAG<br>GTGGTCGGGAGTTCGAATCTCCCCGAGCCCACCA                                                      |
