# Supplementary material for: Structures of KEOPS bound to tRNA reveal functional roles of the kinase Bud32
Source: PubMed Central journal article supplement — Nat Commun. 2024 Dec 5;15:10633. doi: 10.1038/s41467-024-54787-w (PMC11621456; doi:10.1038/s41467-024-54787-w), 2024-12-05
Supplement: 41467_2024_54787_MOESM2_ESM.pdf [file 41467_2024_54787_MOESM2_ESM.pdf]

## **Description of Additional Supplementary Files**

### **File name: Supplementary Movie 1**

**Description:** 3D variability analysis of archaeal KEOPS, reconstituted with Cgi121 (purple), Bud32 (green), Kae1 (blue) and Pcc1 (yellow), bound to substrate tRNA (orange). The movie highlights the dynamic structure of the tRNA when bound to KEOPS.
